# Supplementary material for: Aqueous biphasic systems: a boost brought about by using ionic liquids
Source: Royal Society of Chemistry journal article supplement (doi:10.1039/c2cs35151j), 2012-01-01
Supplement: c2cs35151j.pdf [file c2cs35151j.pdf]

## Supporting Information

# Aqueous Biphasic Systems: A boost brought about by using ionic liquids

**Mara G. Freire,\*<sup>a</sup> Ana Filipa M. Cláudio,<sup>b</sup> João M. M. Araújo,<sup>a</sup> João A. P. Coutinho,<sup>b</sup> Isabel M. Marrucho,<sup>a,b</sup> José N. Canongia Lopes,<sup>c</sup> Luís Paulo N. Rebelo\*<sup>a</sup>**

<sup>a</sup>Instituto de Tecnologia Química e Biológica, ITQB2, Universidade Nova de Lisboa  
(www.itqb.unl.pt), Av. República, Apartado 127, 2780-901 Oeiras, Portugal

<sup>b</sup>Departamento de Química, CICECO (www.ciceco.ua.pt), Universidade de Aveiro,  
3810-193 Aveiro, Portugal

<sup>c</sup>Centro de Química Estrutural, Instituto Superior Técnico (cqe.ist.utl.pt), 1049-001,  
Lisboa, Portugal

\*Corresponding author

Tel: +351 21 4469 441; Fax: +351 21 4411 277; E-mail address: maragfreire@ua.pt;  
luis.rebelo@itqb.unl.pt.

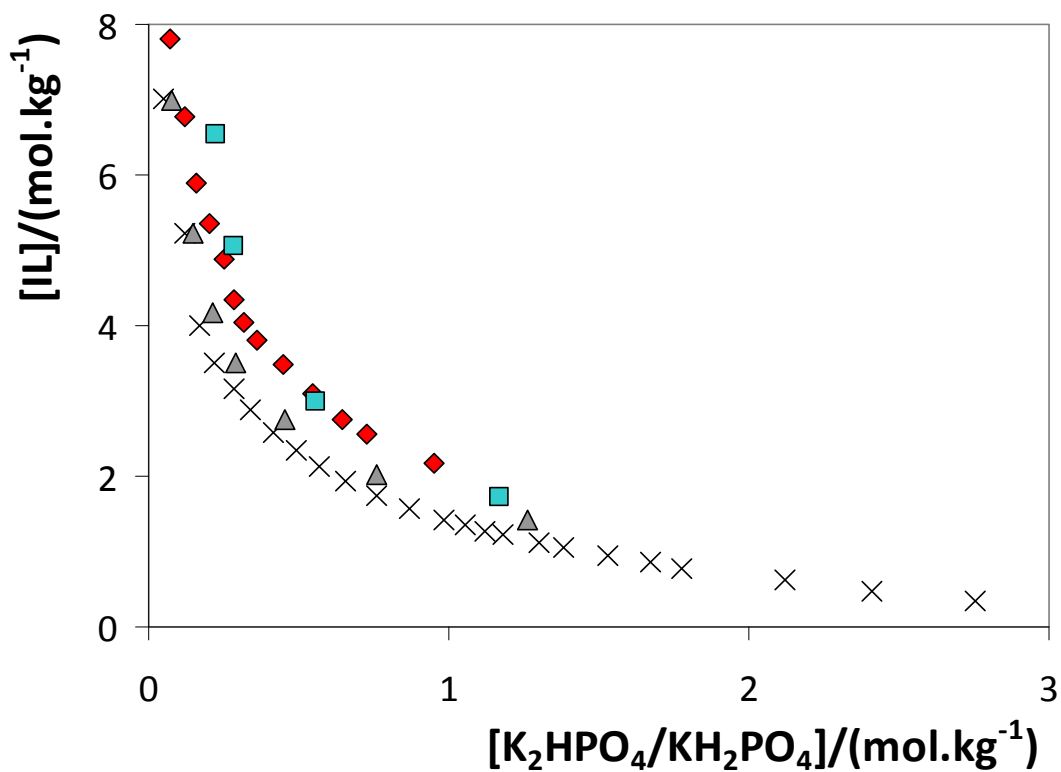

**Fig. S1** Ternary phase diagrams for ABS composed of chloride-based ionic liquids +  $K_2HPO_4/KH_2PO_4$  at 298 K:  $\blacksquare$ ,  $[C_4C_1\text{pyr}]Cl$ ;  $\blacklozenge$ ,  $[C_4C_1\text{im}]Cl$ ;  $\blacktriangle$ ,  $[C_4C_1\text{pip}]Cl$ ;  $\times$ ,  $[C_4\text{-}3\text{-}C_1\text{py}]Cl$ .<sup>45</sup>

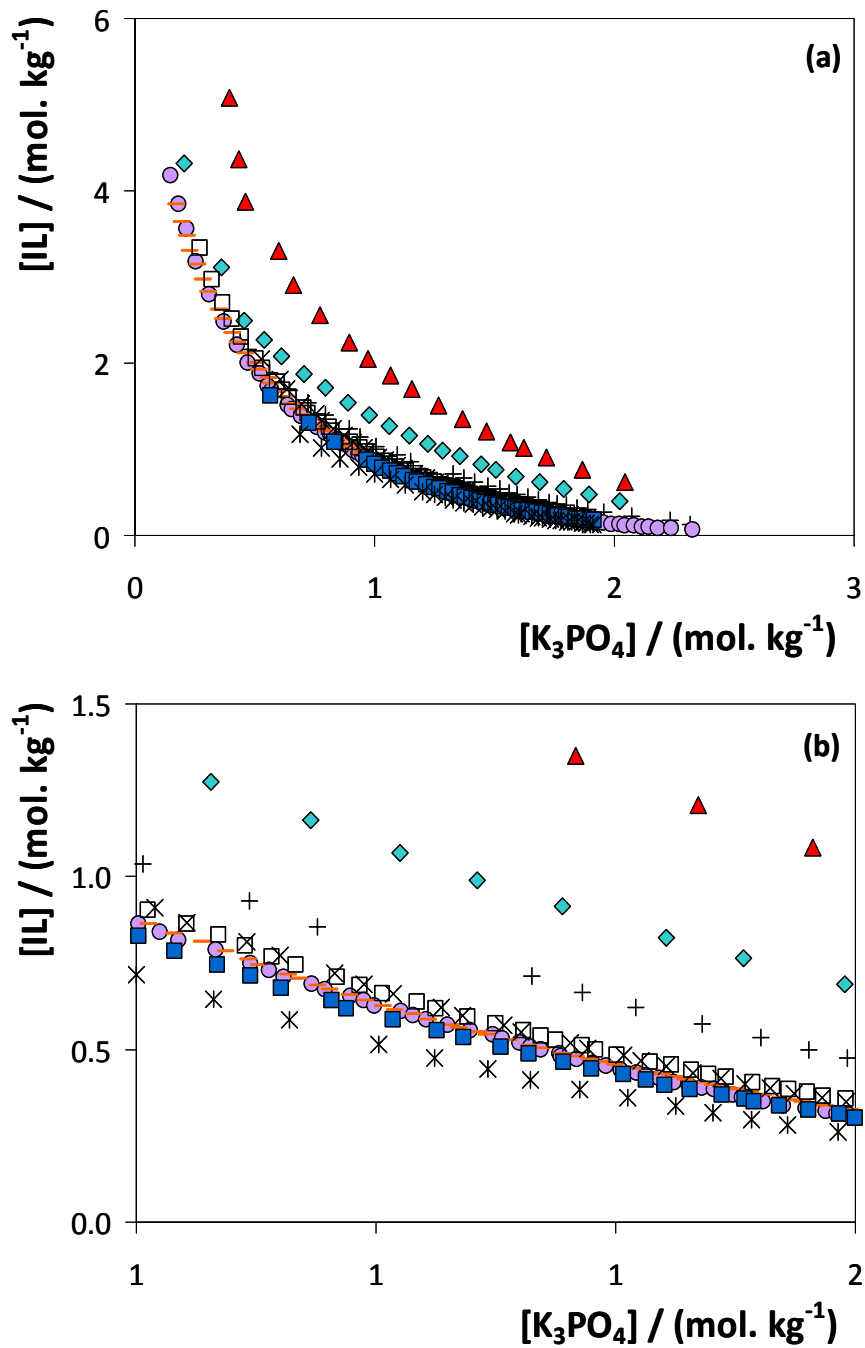

**Fig. S2** Ternary phase diagrams for ABS composed of  $[C_nC_1im]Cl$  ionic liquids +  $K_3PO_4$  at 298 K:  $\blacktriangle$ ,  $[C_1C_1im]Cl$ ;  $\blacklozenge$ ,  $[C_2C_1im]Cl$ ;  $+$ ,  $[C_4C_1im]Cl$ ;  $\bullet$ ,  $[C_6C_1im]Cl$ ;  $-$ ,  $[C_7C_1im]Cl$ ;  $\square$ ,  $[C_8C_1im]Cl$ ;  $\times$ ,  $[C_{10}C_1im]Cl$ ;  $\blacksquare$ ,  $[C_{12}C_1im]Cl$ ;  $*$ ,  $[C_{14}C_1im]Cl$ .<sup>18</sup> (b) is an expansion of (a).

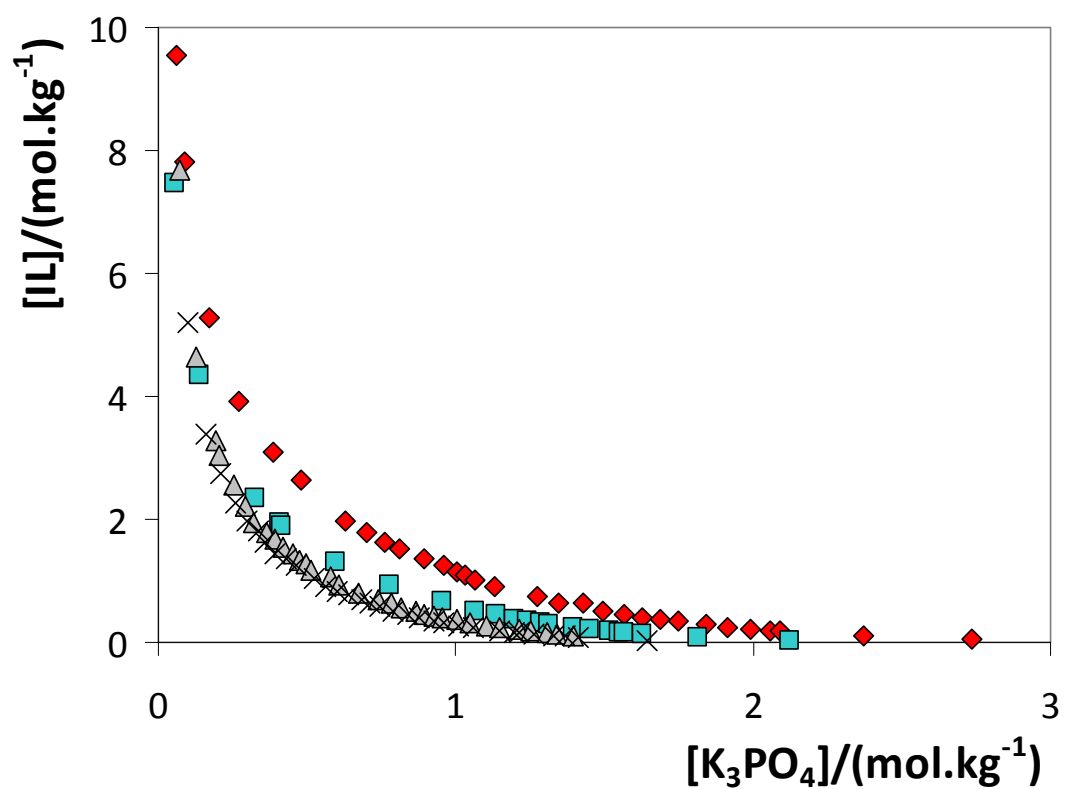

**Fig. S3** Ternary phase diagrams for ABS composed of  $[\text{C}_2\text{C}_1\text{im}]$ -based ionic liquids +  $\text{K}_3\text{PO}_4$  at 298.15 K:  $\blacklozenge$ ,  $[\text{C}_2\text{C}_1\text{im}][\text{C}_1\text{SO}_4]$ ;  $\blacksquare$ ,  $[\text{C}_2\text{C}_1\text{im}][\text{C}_4\text{SO}_4]$ ;  $\blacktriangle$ ,  $[\text{C}_2\text{C}_1\text{im}][\text{C}_6\text{SO}_4]$ ;  $\times$ ,  $[\text{C}_2\text{C}_1\text{im}][\text{C}_8\text{SO}_4]$ .<sup>11</sup>

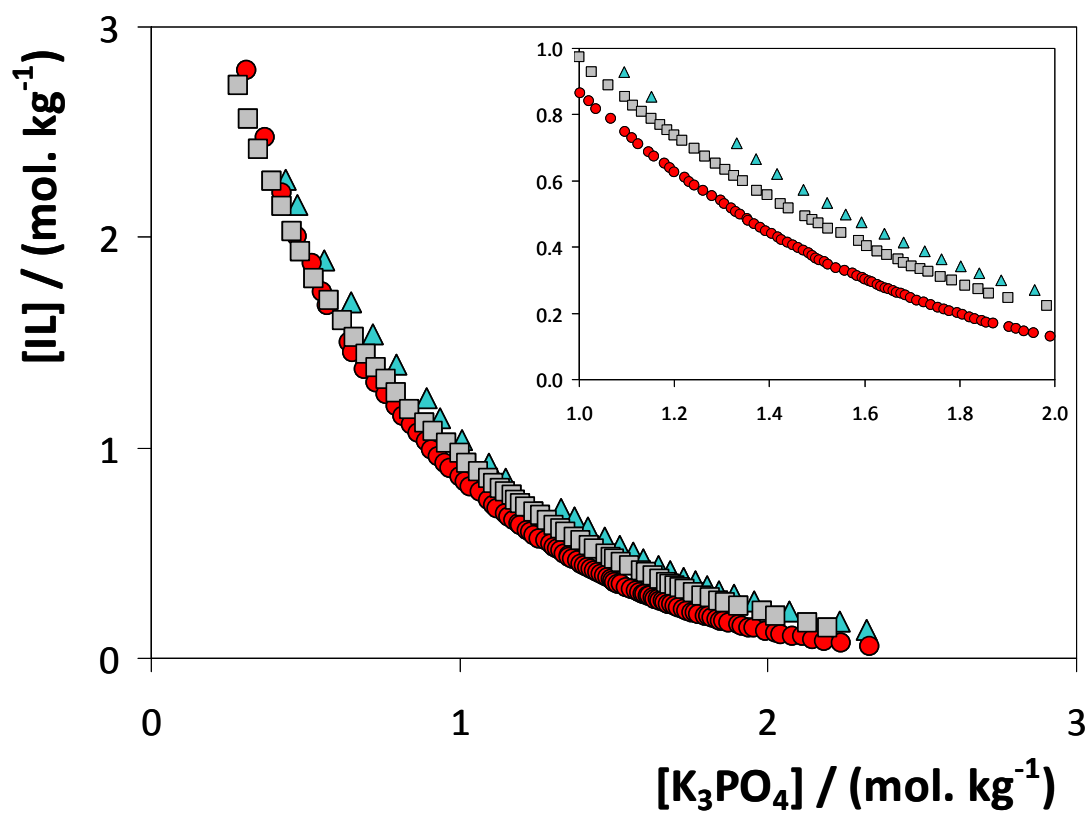

**Fig. S4** Ternary phase diagrams for ABS composed of imidazolium-based ionic liquids +  $K_3PO_4$  at 298 K:  $\blacksquare$ ,  $[C_4C_1C_1im]Cl$ ;  $\blacktriangle$ ,  $[C_4C_1im]Cl$ ;  $\bullet$ ,  $[C_6C_1im]Cl$ .<sup>18</sup>

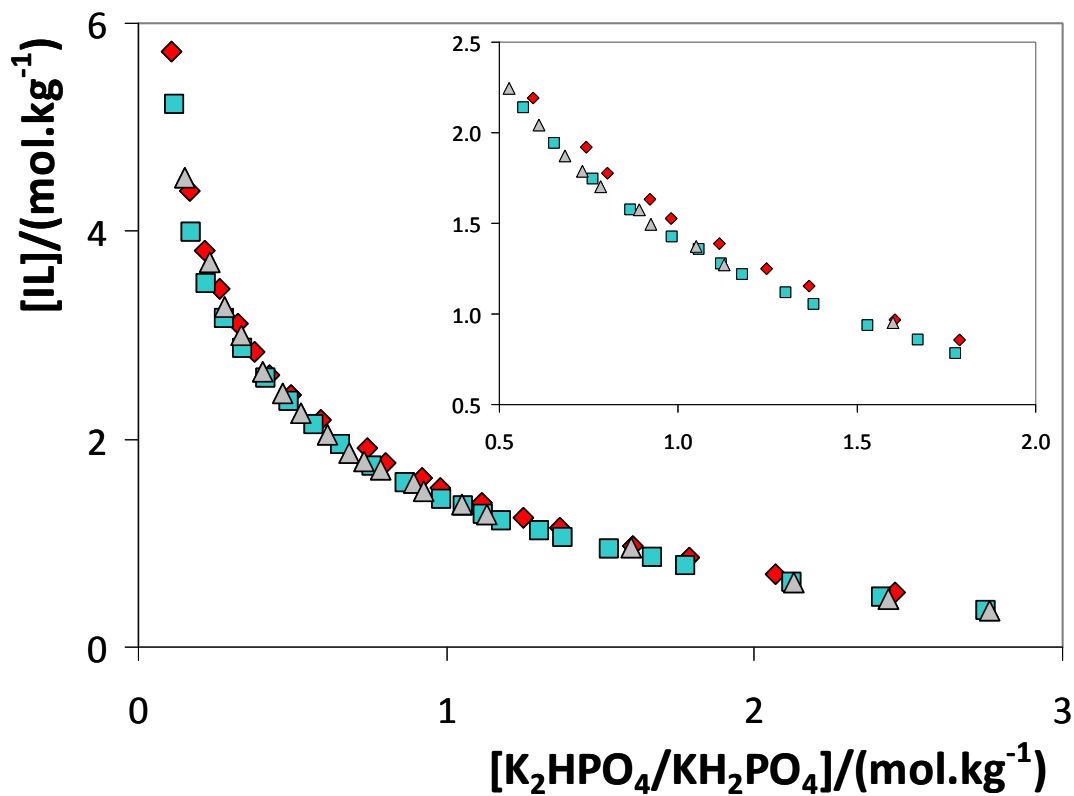

**Fig. S5** Ternary phase diagrams for ABS composed of pyridinium-chloride-based ionic liquids +  $K_2HPO_4/KH_2PO_4$  at 298 K:  $\blacklozenge$ ,  $[C_4-2-C_1py]Cl$ ;  $\blacksquare$ ,  $[C_4-3-C_1py]Cl$ ;  $\blacktriangle$ ,  $[C_4-4-C_1py]Cl$ .<sup>45</sup>

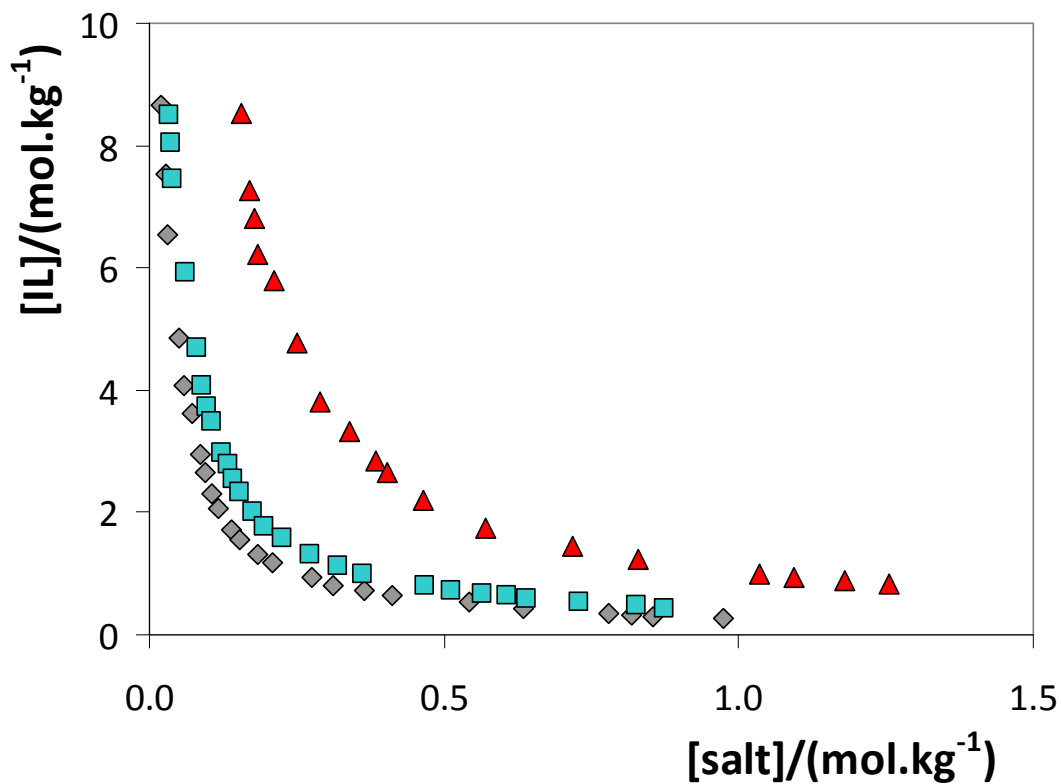

**Fig. S6** Ternary phase diagrams for ABS composed of [C<sub>4</sub>C<sub>1</sub>im][BF<sub>4</sub>] + sodium-based salts at 298.15 K: ▲, NaCH<sub>3</sub>CO<sub>2</sub>; ■, Na<sub>2</sub>C<sub>4</sub>H<sub>4</sub>O<sub>6</sub>; ◆, Na<sub>3</sub>C<sub>6</sub>H<sub>5</sub>O<sub>7</sub>.<sup>21</sup>

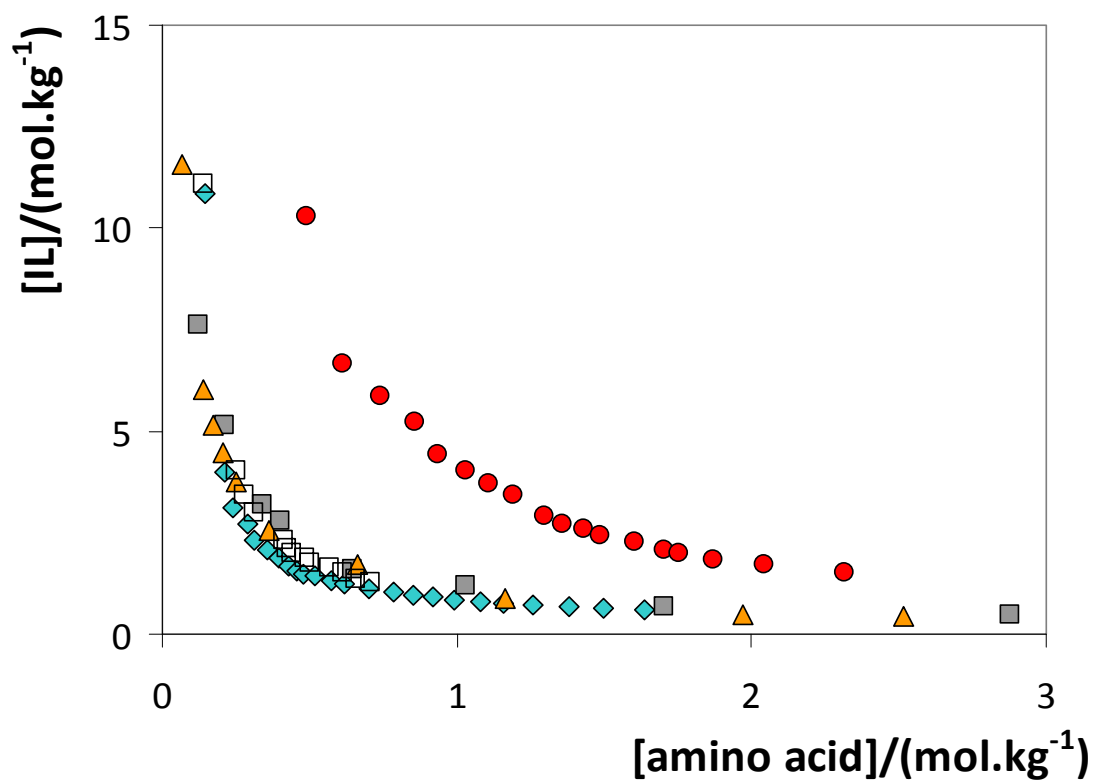

**Fig. S7** Ternary phase diagrams for ABS composed of  $[\text{C}_4\text{C}_1\text{im}][\text{BF}_4]$  + amino acids at 298 K: ●, L-proline; ■, glycine; ▲, L-serine; □, D,L-lysine·HCl; ◆, L-lysine.<sup>14,58</sup>



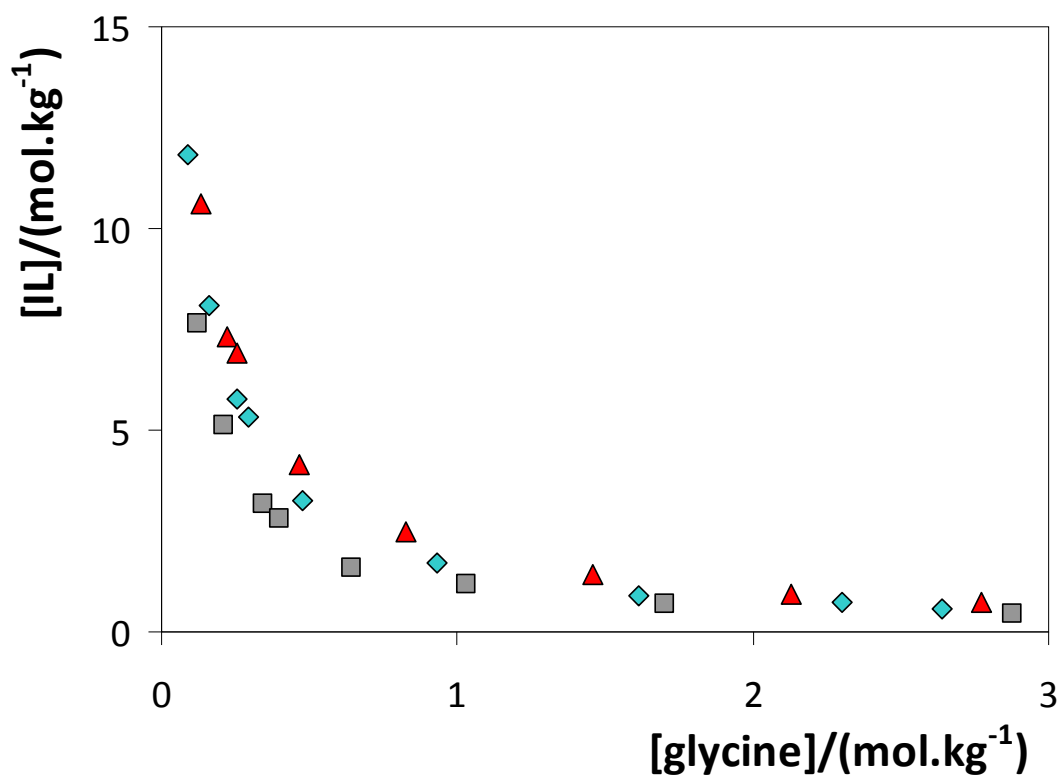

**Fig. S8** Ternary phase diagrams for ABS composed of  $[\text{C}_4\text{C}_1\text{im}][\text{BF}_4]$  + lysine at: ■, 298 K; ◆, 308.15 K; ▲, 318.15 K.<sup>58</sup>

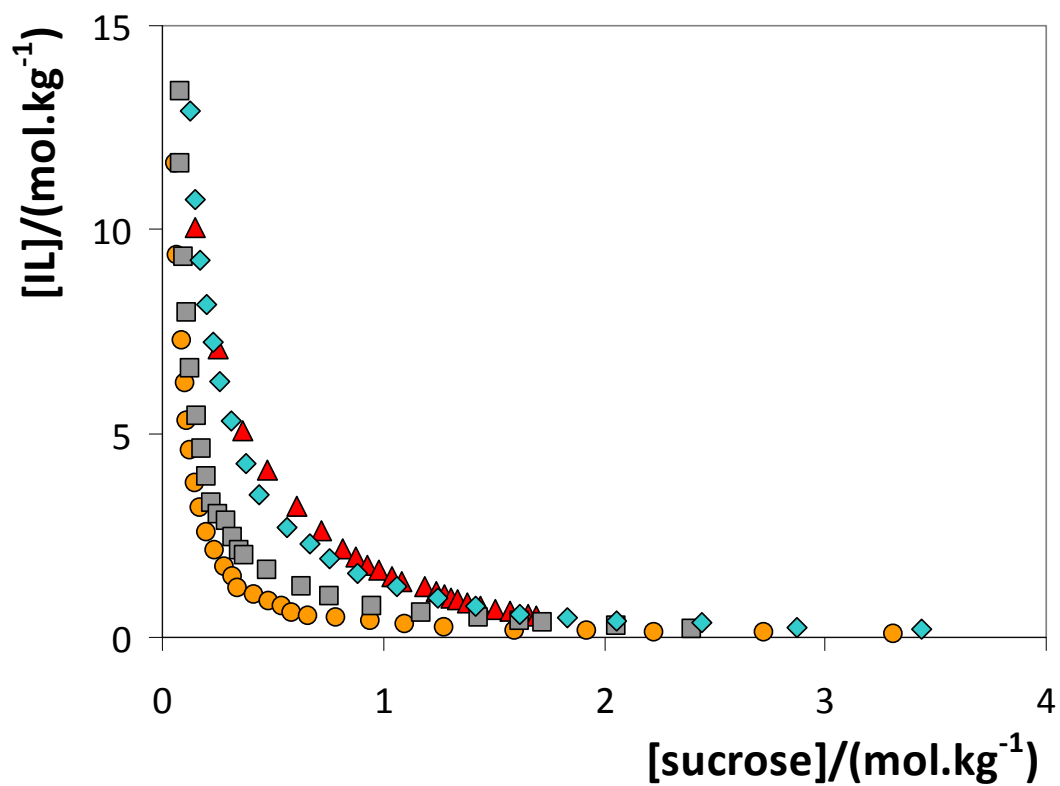

**Fig. S9** Ternary phase diagrams for ABS composed of ionic liquids + sucrose at 298 K:

▲,  $[\text{C}_4\text{C}_1\text{im}][\text{CF}_3\text{SO}_3]$ ; ◆,  $[\text{aC}_1\text{im}]\text{Cl}$ ; ■,  $[\text{aC}_1\text{im}]\text{Br}$ ; ●,  $[\text{C}_4\text{C}_1\text{im}][\text{BF}_4]$ .<sup>17,51</sup>

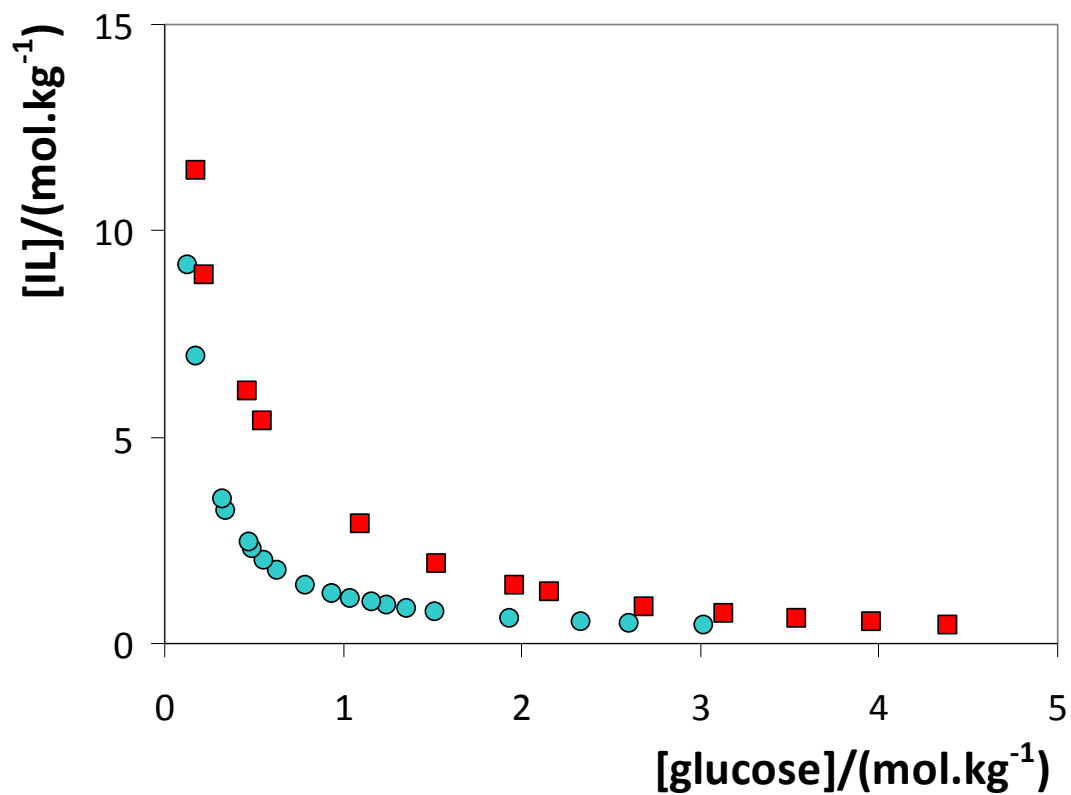

**Fig. S10** Ternary phase diagrams for ABS composed of ionic liquids + glucose at 298 K:

■,  $[\text{C}_3\text{C}_1\text{im}][\text{BF}_4]$ ; ●,  $[\text{C}_4\text{C}_1\text{im}][\text{BF}_4]$ .<sup>8</sup>

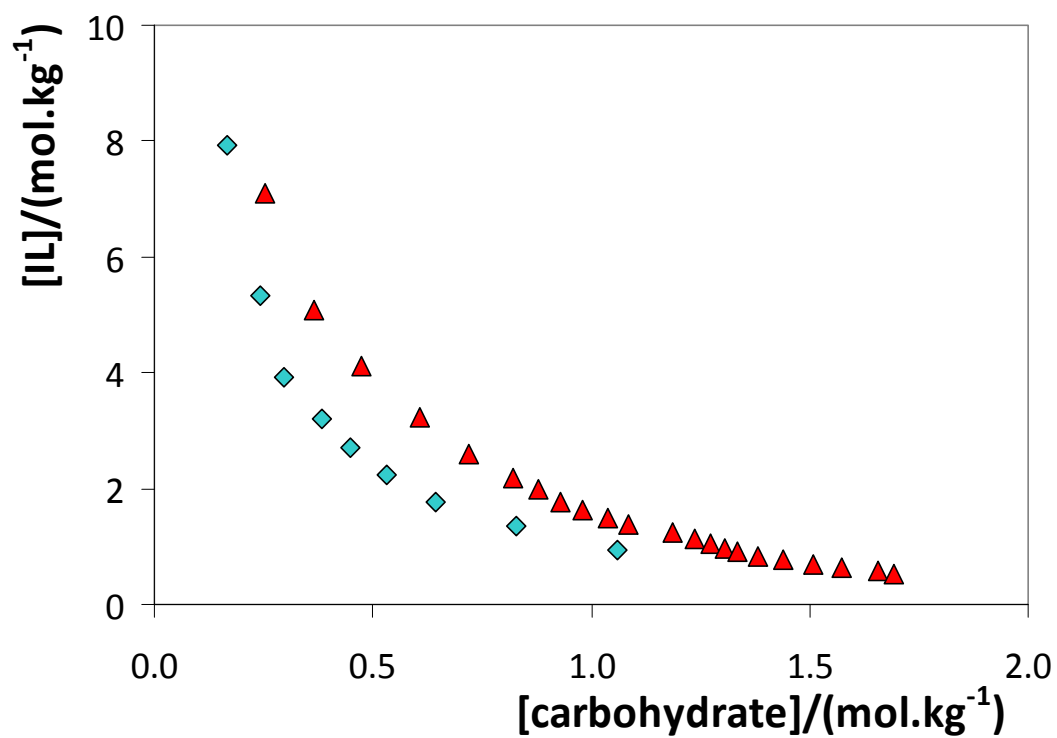

**Fig. S11** Ternary phase diagrams for ABS composed of  $[\text{C}_4\text{C}_1\text{im}][\text{CF}_3\text{SO}_3]$  + dissacharides at 298 K:  $\blacklozenge$ , D-(+)-maltose;  $\blacktriangle$ , sucrose.<sup>17</sup>

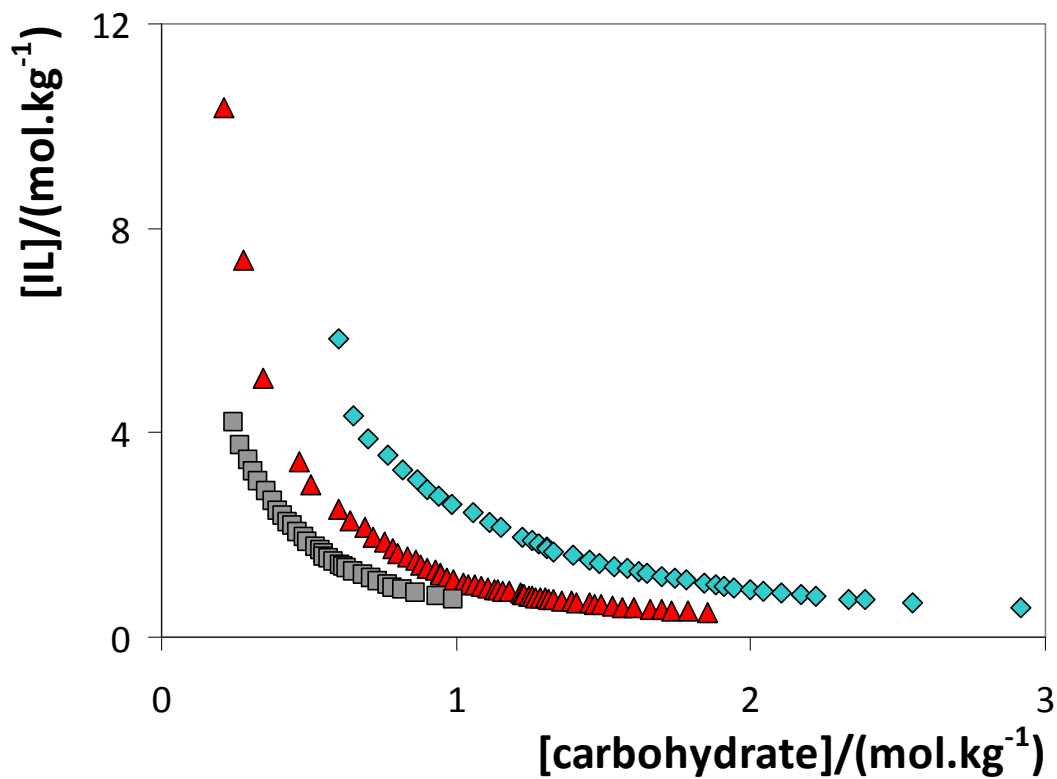

**Fig. S12** Ternary phase diagrams for ABS composed of  $[\text{C}_4\text{C}_1\text{im}][\text{CF}_3\text{SO}_3]$  + polyols at 298 K:  $\blacksquare$ , D-maltitol;  $\blacktriangle$ , D-sorbitol;  $\blacklozenge$ , xylitol.<sup>17</sup>

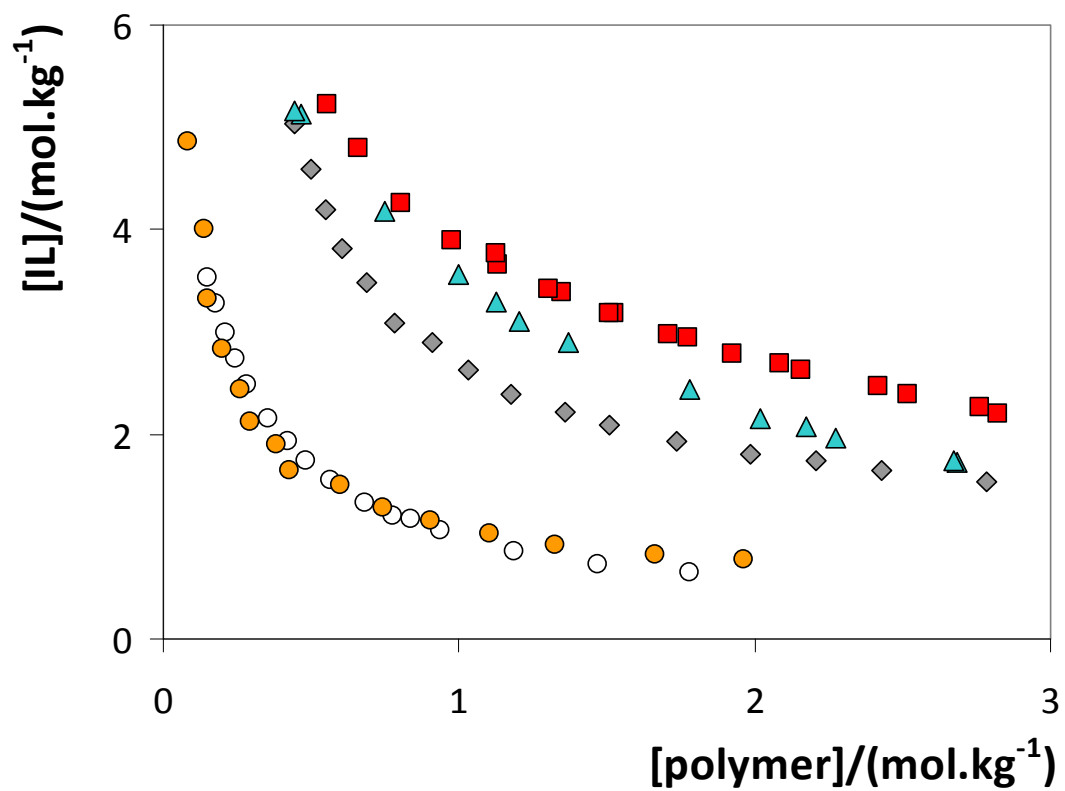

**Fig. S13** Ternary phase diagrams for ABS composed of ionic liquid + PPG 400 at 298 K:  
■, [C<sub>4</sub>C<sub>1</sub>im]Br; ▲, [C<sub>2</sub>C<sub>1</sub>im]Br; ◆, [C<sub>4</sub>C<sub>1</sub>im]Cl; ○, [aC<sub>1</sub>im]Cl; ●, [C<sub>4</sub>C<sub>1</sub>im][C<sub>1</sub>CO<sub>2</sub>].<sup>63-64</sup>

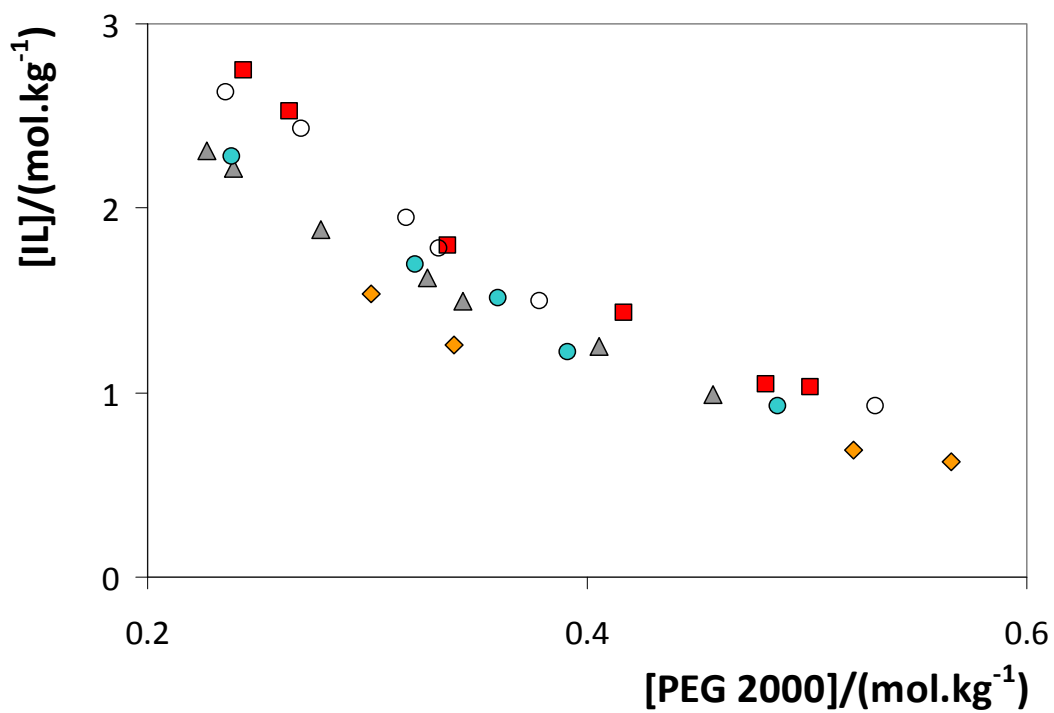

**Fig. S14** Ternary phase diagrams for ABS composed of ionic liquid + PEG 2000 at 298

K: ■, [C<sub>4</sub>C<sub>1</sub>im]Cl; ○, [C<sub>4</sub>C<sub>1</sub>py]Cl; ●, [C<sub>4</sub>C<sub>1</sub>pyr]Cl; ▲, [C<sub>4</sub>C<sub>1</sub>pip]Cl; ◆, [P<sub>4444</sub>]Cl.<sup>60</sup>

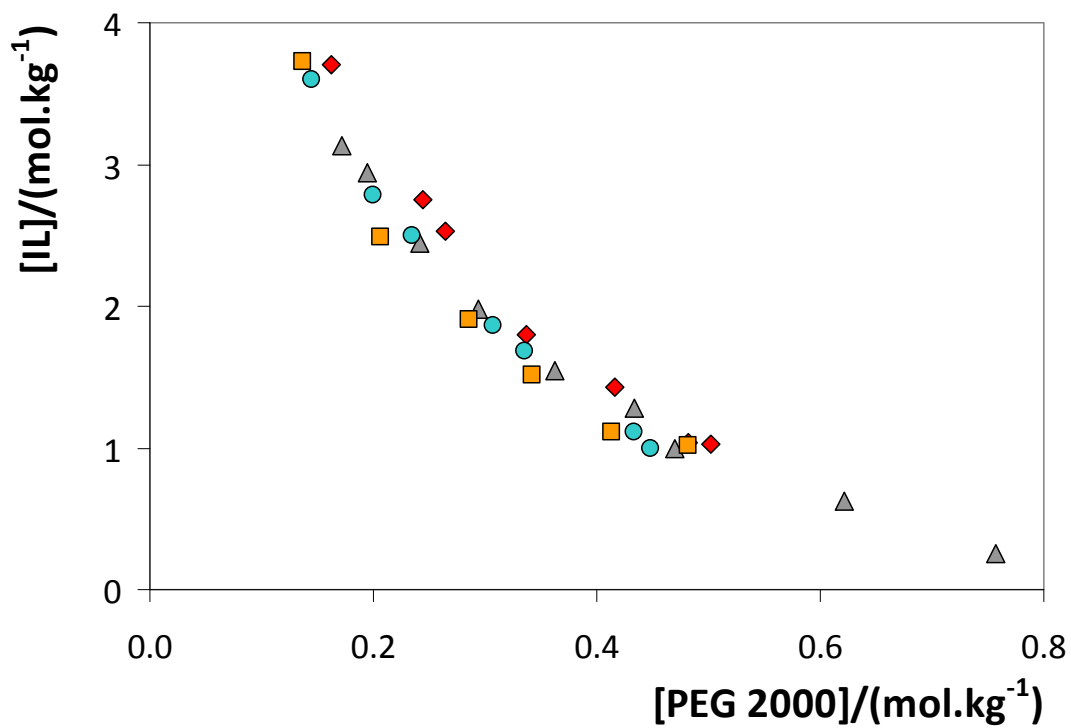

**Fig. S15** Ternary phase diagrams for ABS composed of ionic liquid + PEG 2000 at 298

K:  $\blacklozenge$ , [C<sub>4</sub>C<sub>1</sub>im]Cl;  $\blacktriangle$ , [C<sub>2</sub>C<sub>1</sub>im]Cl;  $\bullet$ , [aC<sub>1</sub>im]Cl;  $\blacksquare$ , [OHC<sub>2</sub>C<sub>1</sub>im]Cl.<sup>60</sup>



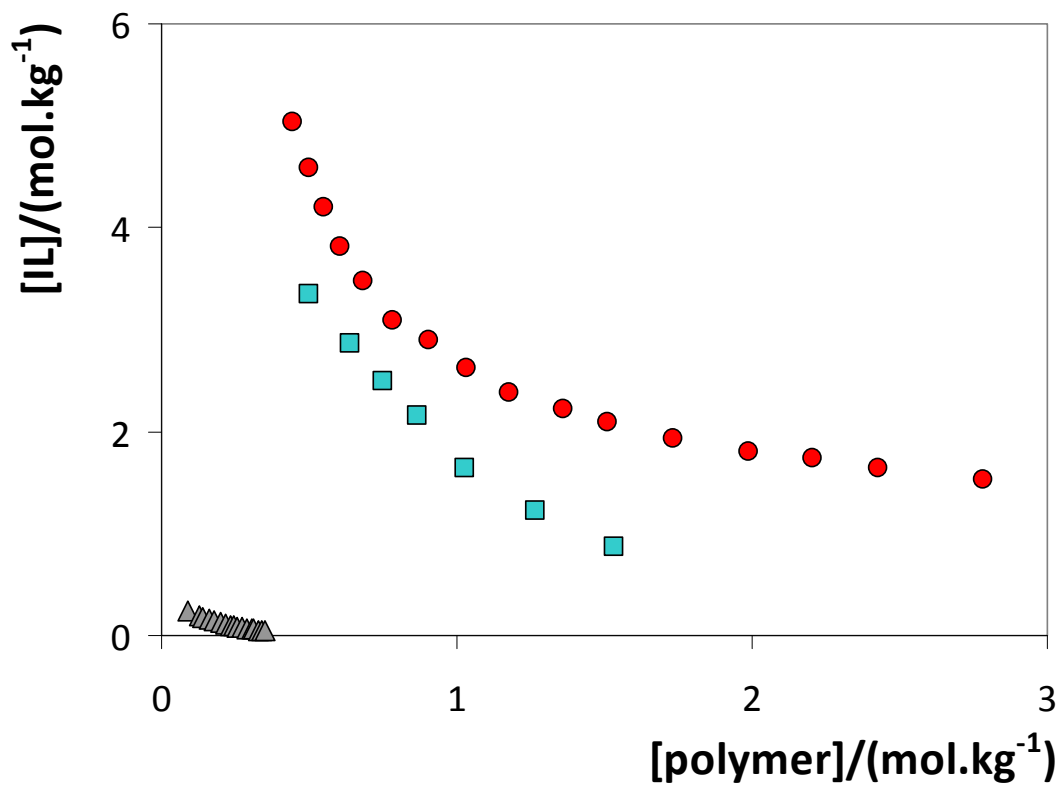

**Fig. S16** Ternary phase diagrams for ABS composed of [C<sub>4</sub>C<sub>1</sub>im]Cl + polymer at 298 K:

●, PPG 400; ■, PEG 1000; ▲, PPG 1000.<sup>60,63</sup>

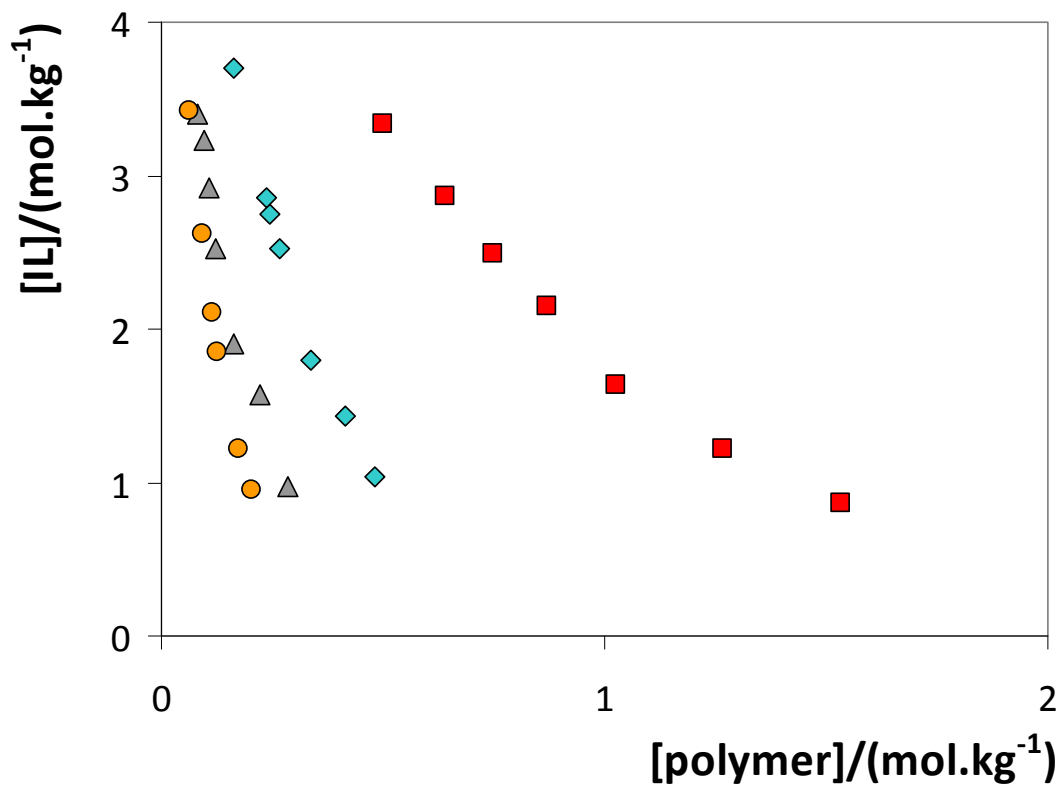

**Fig. S17** Ternary phase diagrams for ABS composed of [C<sub>4</sub>C<sub>1</sub>im]Cl + polymer at 298 K:

■, PEG 1000; ◆, PEG 2000; ▲, PEG 3400; ●, PEG 4000.<sup>60</sup>

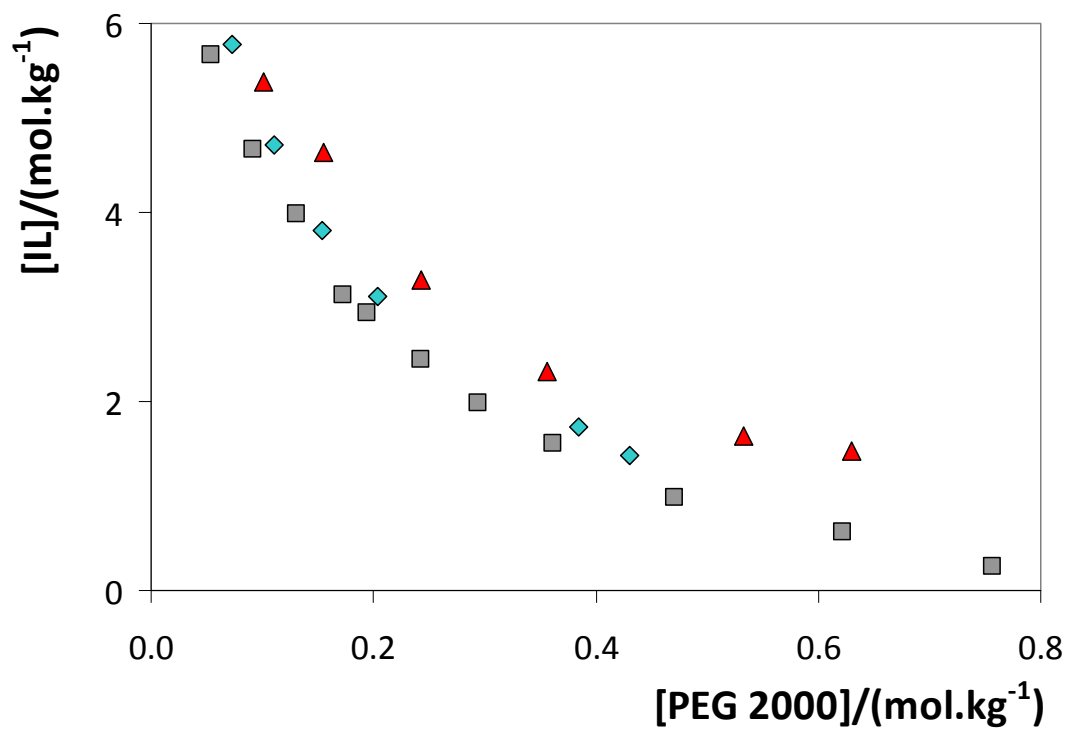

**Fig. S18** Ternary phase diagrams for ABS composed of [C<sub>2</sub>C<sub>1</sub>im]Cl + PEG 2000 at: ▲, 323 K; ◆, 308 K; ■, 298 K.<sup>60</sup>

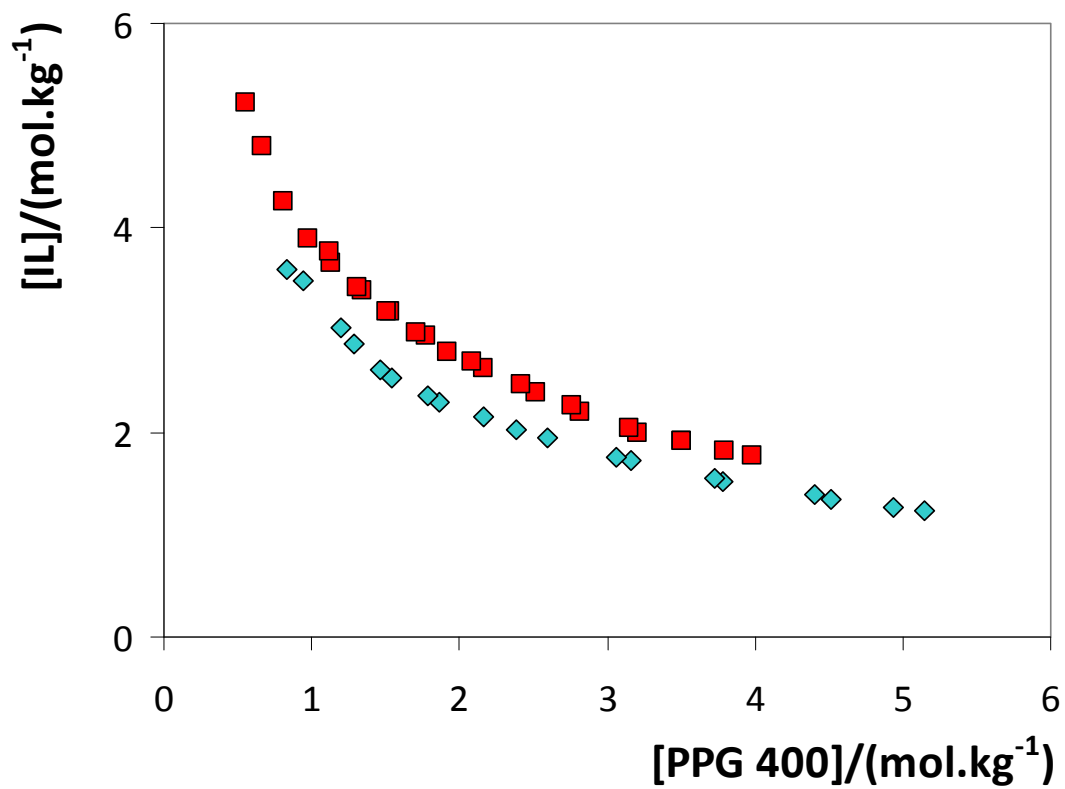

**Fig. S19** Ternary phase diagrams for ABS composed of [C<sub>2</sub>C<sub>1</sub>im]Br + PPG 400 at: ■, 298.15 K; ◆, 318.15 K.<sup>64</sup>

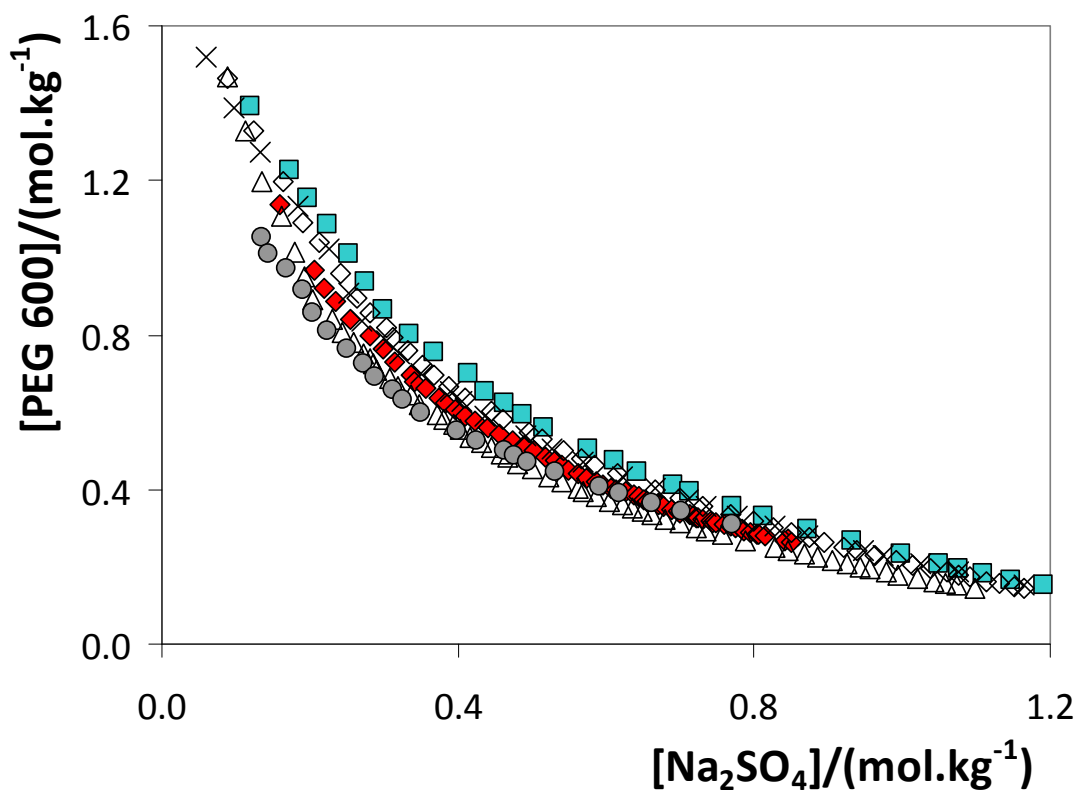

**Fig. S20** Phase diagrams for ABS composed of PEG 600 + Na<sub>2</sub>SO<sub>4</sub> + 5 wt % ionic liquid at 298 K:  $\blacklozenge$ , no ionic liquid;  $\blacksquare$ , [im]Cl;  $\diamond$ , [C<sub>1</sub>im]Cl,  $\times$ , [C<sub>2</sub>C<sub>1</sub>im]Cl;  $\Delta$ , [C<sub>4</sub>C<sub>1</sub>im]Cl;  $\bullet$ , [C<sub>4</sub>C<sub>1</sub>C<sub>1</sub>im]Cl.<sup>61</sup>

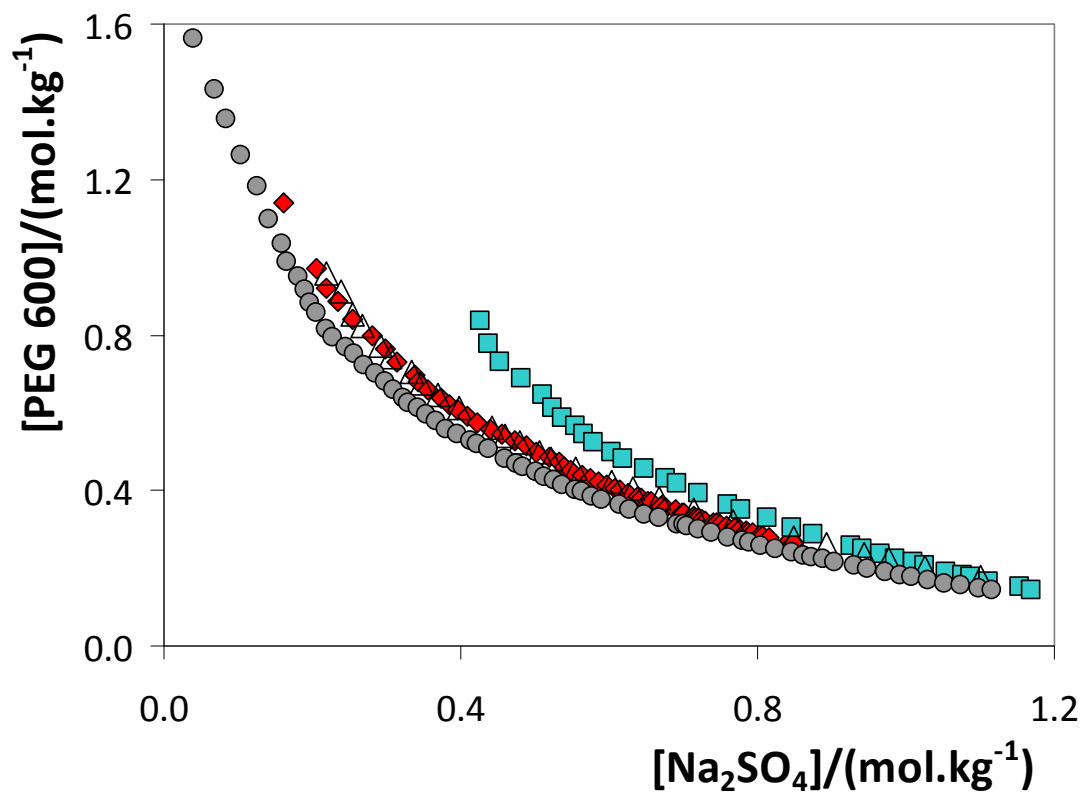

**Fig. S21** Phase diagrams for ABS composed of PEG 600 + Na<sub>2</sub>SO<sub>4</sub> + 5 wt % ionic liquid at 298 K:  $\blacklozenge$ , no ionic liquid;  $\blacksquare$ , [OHC<sub>2</sub>C<sub>1</sub>im]Cl;  $\blacktriangle$ , [aC<sub>1</sub>im]Cl,  $\bullet$ , [C<sub>7</sub>H<sub>7</sub>C<sub>1</sub>im]Cl.<sup>61</sup>

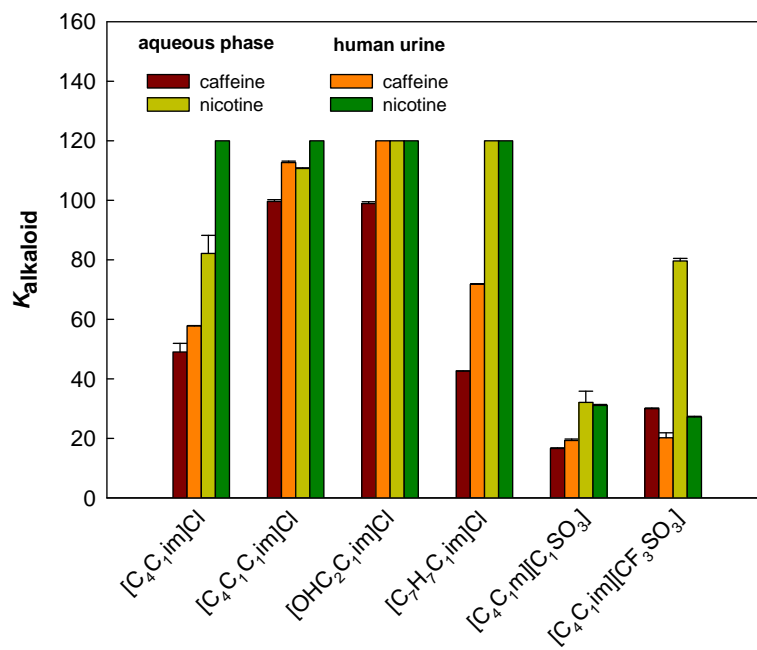

**Fig. S22** Partition coefficients of caffeine and nicotine in different ABS at 298 K, obtained from the direct extraction of alkaloids from a synthetic biological sample – artificial human urine – and from simple aqueous phases.<sup>74</sup>

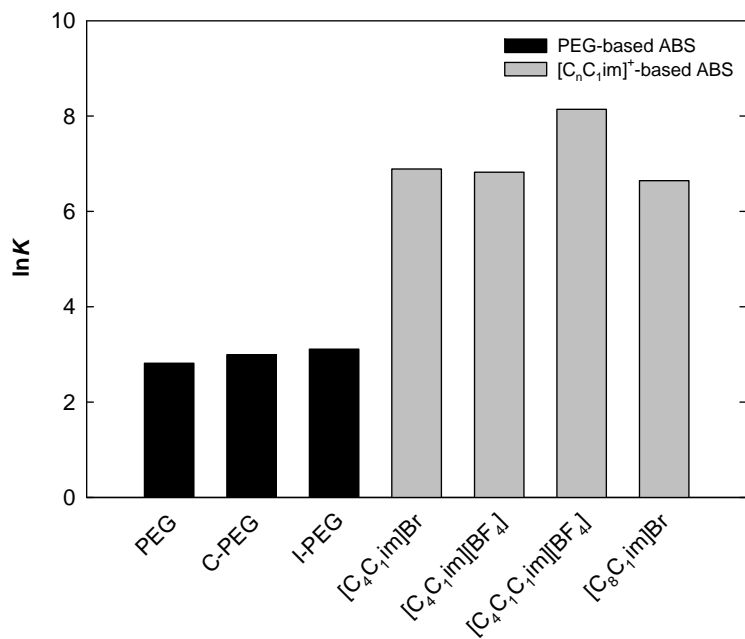

**Fig. S23** Comparison of the partition coefficients of penicillin in ABS composed of several imidazolium-based ionic liquids and NaH<sub>2</sub>PO<sub>4</sub> or Na<sub>2</sub>HPO<sub>4</sub>.<sup>26,90</sup>



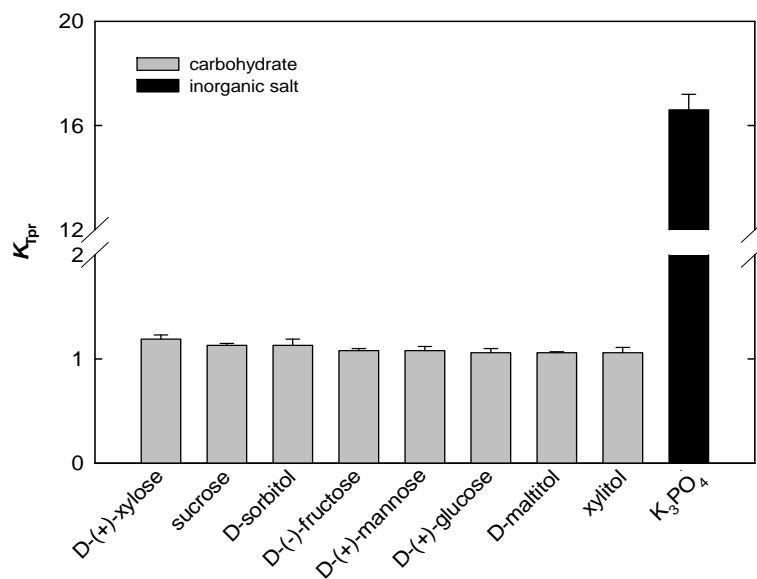

**Fig. S24** Partitioning coefficients of L-tryptophan between  $[C_4C_{1im}][CF_3SO_3]^-$  and carbohydrate-rich aqueous phases at 298 K. The effect of inorganic salt  $K_3PO_4$  on the partition coefficient is also depicted to address the extraction efficiency of carbohydrates.<sup>17,43</sup>

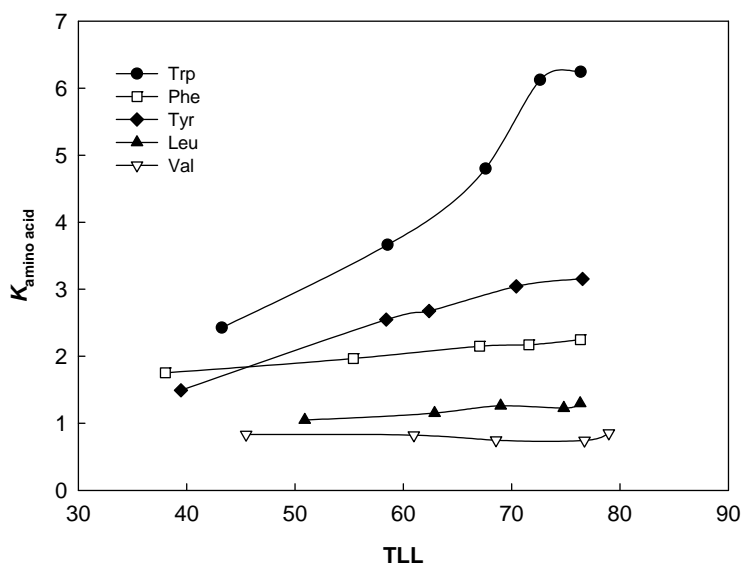

**Fig. S25** Effect of the tie-line length (TLL) on the partitioning coefficients of amino acids for the  $[\text{C}_4\text{C}_1\text{im}]\text{Br}$  + potassium citrate/citric acid +  $\text{H}_2\text{O}$  ABS at  $\text{pH} = 6$ , a  $\text{pH}$  close to the isoelectric point, at  $298.15 \text{ K}$ .<sup>95</sup>

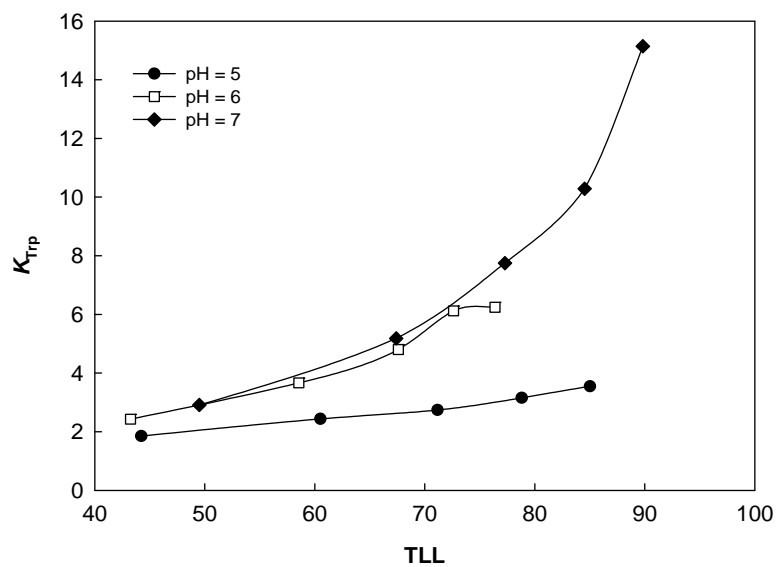

**Fig. S26** Effect of the pH on the partitioning coefficients of tryptophan in the  $[C_4C_{1im}]Br$  + potassium citrate/citric acid +  $H_2O$  ABS at 298.15 K.<sup>95</sup>
